# Supplementary material for: Extracorporeal Membrane Oxygenation Complications in Heparin- and Bivalirudin-Treated Patients
Source: PubMed Central journal article supplement — Crit Care Explor. 2021 Jul 13;3(7):e0485. doi: 10.1097/CCE.0000000000000485 (PMC8280085; doi:10.1097/cce.0000000000000485), 2021-07-13
Supplement: cc9-3-e0485-s001.pdf [file cc9-3-e0485-s001.pdf]

**Supplementary Table 1.** Demographics, comorbidities, and ECMO characteristics of patients without HIT (all of whom were anticoagulated with heparin), patients with confirmed HIT (positive PF4/SRA; anticoagulated with bivalirudin), and those suspected of but not diagnosed with HIT (received bivalirudin while test pending, then transitioned back to heparin once negative).

| <i>Demographic/characteristic</i>              | <b>No HIT<br/>N (%)<br/>N=131</b> | <b>(+) HIT<br/>N (%)<br/>N=4</b> | <b>HIT rule-<br/>out<br/>N=9</b> | <i>p-value</i>   |
|------------------------------------------------|-----------------------------------|----------------------------------|----------------------------------|------------------|
| Mean <b>age</b> , years (SD)                   | 55.9 (15.4)                       | 50.3 (20.2)                      | 49.3 (19.8)                      | 0.391            |
| <b>Male gender</b>                             | 74 (56.5%)                        | 2 (50%)                          | 7 (77.8%)                        | 0.436            |
| <b>Race</b>                                    |                                   |                                  |                                  | 0.918            |
| Caucasian                                      | 75 (57.7%)                        | 3 (75%)                          | 7 (77.8%)                        |                  |
| African American                               | 30 (23.1%)                        | 1 (25%)                          | 2 (22.2%)                        |                  |
| Asian                                          | 10 (7.7%)                         | 0                                | 0                                |                  |
| Hispanic                                       | 6 (4.6%)                          | 0                                | 0                                |                  |
| Other                                          | 9 (6.9%)                          | 0                                | 0                                |                  |
| <b>Comorbidities</b>                           |                                   |                                  |                                  |                  |
| Hypertension                                   | 86 (66.2%)                        | 3 (75%)                          | 6 (66.7%)                        | 0.934            |
| Diabetes                                       | 37 (28.5%)                        | 3 (75%)                          | 1 (11.1%)                        | 0.062            |
| CHF                                            | 32 (24.8%)                        | 2 (50%)                          | 3 (33.3%)                        | 0.462            |
| Chronic Kidney Disease                         | 13 (10.0%)                        | 1 (25%)                          | 1 (11.1%)                        | 0.627            |
| Atrial fibrillation                            | 25 (19.4%)                        | 3 (75%)                          | 1 (11.1%)                        | <b>0.019</b>     |
| Prior ICH                                      | 1 (0.8%)                          | 1 (25%)                          | 2 (22.2%)                        | <b>&lt;0.001</b> |
| <b>Pre-hospital Medications</b>                |                                   |                                  |                                  |                  |
| Antiplatelet therapy                           | 61 (46.9%)                        | 1 (25%)                          | 5 (55.6%)                        | 0.594            |
| Anticoagulation                                | 26 (19.9%)                        | 3 (75%)                          | 4 (44.4%)                        | <b>0.010</b>     |
| <b>Type of ECMO</b>                            |                                   |                                  |                                  | 0.524            |
| Veno-Arterial (VA)                             | 107 (81.7%)                       | 3 (75%)                          | 6 (66.7%)                        |                  |
| Veno-Venous (VV)                               | 24 (18.3%)                        | 1 (25%)                          | 3 (33.3%)                        |                  |
| Central Cannulation                            | 57 (43.5%)                        | 0 (0%)                           | 3 (33.3%)                        | 0.192            |
| <b>Duration of ECMO, days (IQR)</b>            | 4.0 (2.4-8.6)                     | 11.7 (10.2-13.1)                 | 12.1 (6.7-15.8)                  | <b>&lt;0.001</b> |
| <b>Pre-ECMO Mechanical Circulatory Support</b> |                                   |                                  |                                  |                  |
| IABP                                           | 30 (22.9%)                        | 1 (25%)                          | 2 (22.2%)                        | 0.994            |
| LVAD                                           | 4 (3.1%)                          | 0                                | 1 (11.1%)                        | 0.411            |
| <b>Pre-ECMO Characteristics</b>                |                                   |                                  |                                  |                  |
| GCS score (SD)                                 | 12 (4)                            | 12 (6)                           | 9 (6)                            | 0.370            |
| Lactate, mmol/L (SD)                           | 6.9 (5.2)                         | 3.9                              | 13.5 (12.5)                      | <b>0.026</b>     |
| ABG: pH, mean (SD)                             | 7.25 (0.14)                       | 7.23 (0.04)                      | 7.31 (0.08)                      | 0.428            |
| pCO2                                           | 47 (19)                           | 52 (17)                          | 44 (12)                          | 0.745            |
| pO2                                            | 181 (123)                         | 130 (131)                        | 181 (110)                        | 0.706            |
| HCO3                                           | 20 (7)                            | 21 (6)                           | 21 (5)                           | 0.918            |
| <b>ECMO Day 1</b>                              |                                   |                                  |                                  |                  |
| APACHE II score (SD)*                          | 23 (9)                            | 24 (2)                           | 23 (4)                           | 0.994            |
| SOFA score (SD)**                              | 11 (3)                            | 14 (2)                           | 13 (4)                           | 0.056            |
| Platelet count (/μL)                           | 112 (89)                          | 146 (98)                         | 137 (94)                         | 0.559            |

|                    |             |             |             |       |
|--------------------|-------------|-------------|-------------|-------|
| Fibrinogen (mg/dL) | 253 (119)   | 330 (251)   | 266 (272)   | 0.614 |
| Hemoglobin (g/dL)  | 9.4 (2.1)   | 9.0 (2.1)   | 9.5 (1.1)   | 0.922 |
| Creatinine (mg/dL) | 1.5 (1.2)   | 2.0 (1.1)   | 1.5 (0.7)   | 0.702 |
| Lactate (mmol/L)   | 5.7 (4.7)   | 4.3 (4.2)   | 4.0 (3.6)   | 0.477 |
| AST (units/L)      | 1034 (2540) | 1668 (2778) | 1037 (1632) | 0.883 |
| LDH (units/L)      | 1724 (3036) | 1725        | 1742 (2381) | 0.999 |

SD: standard deviation, CHF: congestive heart failure, ICH: intracerebral hemorrhage, IABP: intra-aortic balloon pump, LVAD: left ventricular assist device; GCS: Glasgow Coma Scale, ABG: arterial blood gas, APACHE: Acute Physiology and Chronic Health Evaluation, SOFA: Sequential Organ Failure Assessment, AST: aspartate aminotransferase, LDH: lactic acid dehydrogenase

\* An APACHE II score of 23 or 24 (20-24) corresponds to an approximate in-hospital non-operative mortality of 40% or post-operative mortality of 30%.

\*\* A SOFA score of 11 (10-11) is associated with a 50% mortality rate if initial score or a 45.8% mortality if highest score. A SOFA score of 13 or 14 (12-14) is associated with a 95% mortality if initial score or a 80% mortality if highest score.
