# Supplementary material for: Extracorporeal Membrane Oxygenation Complications in Heparin- and Bivalirudin-Treated Patients
Source: PubMed Central journal article supplement — Crit Care Explor. 2021 Jul 13;3(7):e0485. doi: 10.1097/CCE.0000000000000485 (PMC8280085; doi:10.1097/cce.0000000000000485), 2021-07-13
Supplement: cc9-3-e0485-s002.pdf [file cc9-3-e0485-s002.pdf]

**Supplementary Table 2.** Complications and in-hospital mortality for patients without HIT (all of whom were anticoagulated with heparin), patients with confirmed HIT (positive PF4/SRA; anticoagulated with bivalirudin), and those suspected of but not diagnosed with HIT (received bivalirudin while test pending, then transitioned back to heparin once negative).

| <i>Complication</i>              | <b>No HIT<br/>N (%)<br/>N=131</b>                       | <b>(+) HIT<br/>N (%)<br/>N=4</b> | <b>HIT rule-<br/>out<br/>N=9</b> | <i>p-value</i>   |
|----------------------------------|---------------------------------------------------------|----------------------------------|----------------------------------|------------------|
| Need for <b>CRRT</b> on ECMO     | 64 (49.2%)                                              | 4 (100%)                         | 7 (77.8%)                        | <b>0.039</b>     |
| In-hospital <b>Mortality</b>     | 81 (64.3%)                                              | 3 (75%)                          | 6 (66.7%)                        | 0.900            |
|                                  | <b>Event rate (Number of events/Number of patients)</b> |                                  |                                  |                  |
| <b>Hemorrhagic Complications</b> | 0.53                                                    | 1.0                              | 0.78                             | 0.073            |
| Surgical site bleeding           | 0.27                                                    | 0.25                             | 0.33                             | 0.907            |
| GI bleeding                      | 0.07                                                    | 0.50                             | 0.44                             | <b>&lt;0.001</b> |
| Pulmonary hemorrhage             | 0.08                                                    | 0                                | 0                                | 0.587            |
| ICH/SAH/SDH                      | 0.07                                                    | 0                                | 0                                | 0.621            |
| Other bleeding                   | 0.03                                                    | 0.25                             | 0                                | 0.052            |
| DIC                              | 0.02                                                    | 0                                | 0                                | 0.859            |
| <b>Thrombotic Complications</b>  | 0.32                                                    | 0.25                             | 0.22                             | 0.797            |
| Limb ischemia                    | 0.11                                                    | 0.25                             | 0.11                             | 0.709            |
| Ischemic stroke                  | 0.09                                                    | 0                                | 0.11                             | 0.800            |
| Intracardiac thrombus            | 0.05                                                    | 0                                | 0                                | 0.733            |
| DVT                              | 0.04                                                    | 0                                | 0                                | 0.773            |
| PE                               | 0.03                                                    | 0                                | 0                                | 0.815            |

CRRT: continuous renal replacement therapy, GI: gastrointestinal, ICH: intracerebral hemorrhage, SAH: subarachnoid hematoma, SDH: subdural hematoma, DIC: disseminated intravascular coagulation, DVT: deep vein thrombosis, PE: pulmonary embolus
