# Supplementary material for: Extracorporeal Membrane Oxygenation Complications in Heparin- and Bivalirudin-Treated Patients
Source: PubMed Central journal article supplement — Crit Care Explor. 2021 Jul 13;3(7):e0485. doi: 10.1097/CCE.0000000000000485 (PMC8280085; doi:10.1097/cce.0000000000000485), 2021-07-13
Supplement: cc9-3-e0485-s003.pdf [file cc9-3-e0485-s003.pdf]

**Supplementary Table 3.** Time to therapeutic (50-65 seconds) activated partial thromboplastic time (aPTT), number of aPTT labs drawn, percentage in therapeutic range, and dose changes for heparin versus bivalirudin in the ten ECMO patients who were treated with both.

| <i>Coagulant Characteristic</i>     | <b>Heparin</b>              | <b>Bivalirudin</b>            | <i>p-value</i> |
|-------------------------------------|-----------------------------|-------------------------------|----------------|
| <b>Time to therapeutic, hours</b>   | 8.0 (3.7)<br>( <i>n</i> =5) | 13.3 (10.3)<br>( <i>n</i> =4) | 0.578          |
| <b>Number of aPTT drawn per day</b> | 2.8 (1.0)                   | 3.7 (2.0)                     | 0.299          |
| <b>Percentage therapeutic</b>       | 41.7% (17.8%)               | 43.8% (37.5%)                 | 0.880          |
| <b>Subtherapeutic</b>               | 36.4% (19.8%)               | 46.4% (35.3%)                 | 0.409          |
| <b>Supratherapeutic</b>             | 21.9% (13.8%)               | 9.9% (15.6%)                  | 0.175          |
| <b>Dose changes per day</b>         | 1.4 (0.4)                   | 2.2 (1.8)                     | 0.191          |
